# Supplementary material for: Increased Incidence of Telogen Effluvium Following Platelet-Rich Plasma Therapy in Patients with Elevated TNF-α Expression: A Prospective Cohort Study
Source: Research Square preprint supplement (doi:10.21203/rs.3.rs-6905198/v1), 2025-08-27
Supplement: Supplementary file 1 [file 74c9d5002501345ed1567d5f.pdf]

## Supplementary Data

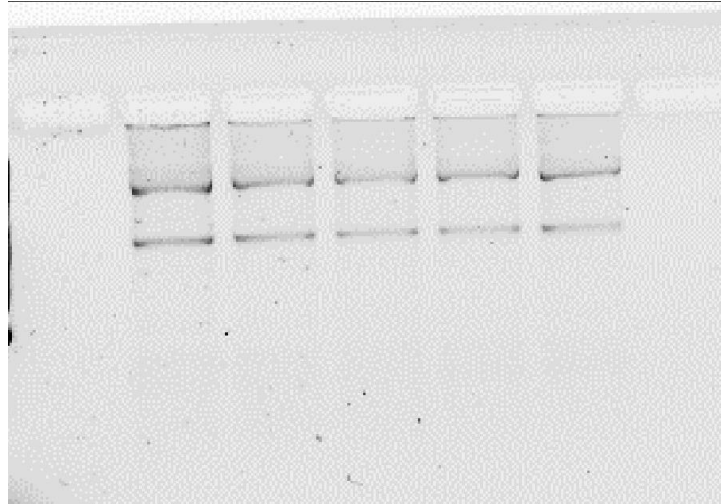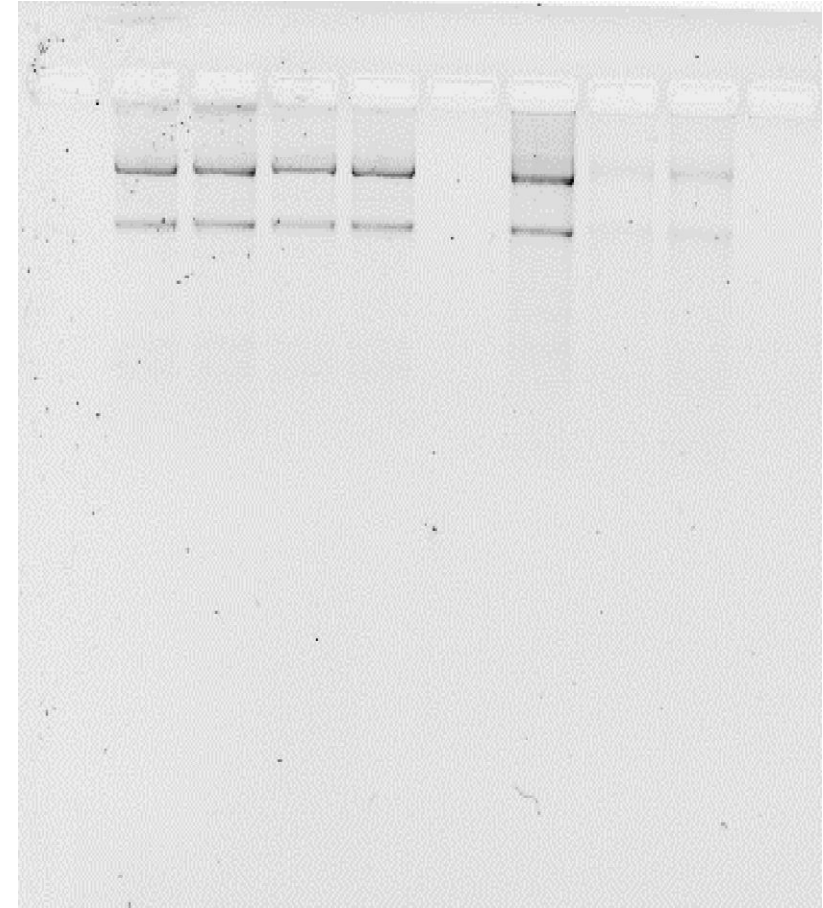

The blot gels that was used for showing androgen receptor and control GAPDH in two groups of our study.
